# Supplementary material for: Long-term Sculpting of the B-cell Repertoire following Cancer Immunotherapy in Patients Treated with Sipuleucel-T
Source: Oxford University Press journal article supplement (doi:10.1158/2326-6066.cir-20-0252), 2020-09-23
Supplement: 23266066cir200252-sup-240559_3_supp_6514601_qfq9ft.docx [file 23266066cir200252-sup-240559_3_supp_6514601_qfq9ft.docx]

**Supplementary Table 2. The public clones shared between treated patients at baseline and naïve patients at post-baseline time points.** The table is separated by the 5 public clones, for which, each was shared by two treated patients and two naïve patients. For each clone, the corresponding amino acid sequence, gene information, as well as their abundance at each timepoint for each shared patient were listed. NA = the corresponding blood sample was not available at that time point. 0 = the corresponding clonotype was not detected in the available blood sample.

| Amino Acid Sequence | vGene | jGene | Week 0 | Week 2 | Week 4 | Week 6 | Week 26 | Week 52 | Group | Patient  ID |
| --- | --- | --- | --- | --- | --- | --- | --- | --- | --- | --- |
| CGTGAAGGGCCGGTTCACCATCTCCAGAGACAATTCCAAGAACACGCTGTATCTGCAAATGAACAGCCTGAGAGCCGAGGACACGGCCGTATATTACTGTGCGAAAGATCTTGACTACTGGGGCCAGGGA | | | | | | | | | | |
| CAKDLDYW | IGHV03-23 | IGHJ04-01 | 112 | 0 | 0 | 0 | 0 | 0 | Treated | P101-010-0004 |
| CAKDLDYW | IGHV03-23 | IGHJ04-01 | 41 | 0 | 0 | 0 | NA | 0 | Treated | P101-008-0007 |
| CAKDLDYW | IGHV03-23 | IGHJ04-01 | 0 | 0 | 16 | 0 | 0 | 0 | Naive | P122-206-0023 |
| CAKDLDYW | IGHV03-23 | IGHJ04-01 | 0 | 0 | 0 | 38 | NA | 0 | Naive | P122-307-0068 |
| CTCTGTGAAGGGCCGATTCACCATCTCCAGAGACAACGCCAAGAACTCCCTGTATCTGCAAATGAACAGTCTGAGAGCTGAGGACACGGCCTTGTATTACTGTGCAAAAGAGGACTACTGGGGCCAGGGA | | | | | | | | | | |
| CAKEDYW | IGHV03-09 | IGHJ04-01 | 265 | 0 | 0 | 0 | 0 | 0 | Treated | P101-010-0004 |
| CAKEDYW | IGHV03-09 | IGHJ04-01 | 19 | 12 | 0 | 0 | NA | 0 | Treated | P101-008-0007 |
| CAKEDYW | IGHV03-09 | IGHJ04-01 | 0 | 0 | 77 | 0 | 0 | 0 | Naive | P122-206-0023 |
| CAKEDYW | IGHV03-09 | IGHJ04-01 | 0 | 0 | 67 | 0 | 0 | 0 | Naive | P122-101-0069 |
| CGTGAAGGGCCGATTCACCATCTCCAGAGACAATTCCAAGAACACGCTGTATCTGCAAATGAACAGCCTGAGAGCCGAGGACACGGCTGTGTATTACTGTGCGAGAGATTTTGACTACTGGGGCCAGGGA | | | | | | | | | | |
| CARDFDYW | IGHV3-30/33 | IGHJ04-01 | 126 | 0 | 0 | 50 | NA | 12 | Treated | P122-101-0069 |
| CARDFDYW | IGHV3-30/33 | IGHJ04-01 | 79 | 0 | 0 | 0 | 0 | NA | Treated | P101-107-0001 |
| CARDFDYW | IGHV3-30/33 | IGHJ04-01 | 0 | NA | NA | 186 | 0 | NA | Naive | P122-205-0041 |
| CARDFDYW | IGHV3-30/33 | IGHJ04-01 | 0 | 0 | 0 | 0 | 0 | 233 | Naive | P122-101-0069 |
| CCTCAAGAGTCGAGTCACCATATCAGTAGACACGTCCAAGAACCAGTTCTCCCTGAAGCTGAGCTCTGTGACCGCTGCGGACACGGCCGTGTATTACTGTGCGAGAGATCTTGACTACTGGGGCCAGGGA | | | | | | | | | | |
| CARDLDYW | IGHV4-59 | IGHJ04-01 | 9 | 0 | 0 | 40 | NA | 0 | Treated | P101-008-0007 |
| CARDLDYW | IGHV4-59 | IGHJ04-01 | 54 | 0 | 0 | 0 | 0 | 0 | Treated | P101-010-0004 |
| CARDLDYW | IGHV4-59 | IGHJ04-01 | 0 | 0 | 86 | 0 | 0 | NA | Naive | P122-205-0048 |
| CARDLDYW | IGHV4-59 | IGHJ04-01 | 0 | 122 | 0 | 0 | 0 | 0 | Naive | P122-205-0025 |
| CATCTCCAGAGACAACGCCAAGAACTCACTGTATCTGCAAATGAACAGCCTGAGAGCCGAGGACACGGCTGTGTATTACTGTGCGAGAGATAGCAGTGGCTGGTACTACTTTGACTACTGGGGCCAGGGA | | | | | | | | | | |
| CARDSSGWYYFDYW | IGHV3-11/21 | IGHJ04-01 | 19 | 0 | 0 | 0 | NA | 0 | Treated | P101-008-0007 |
| CARDSSGWYYFDYW | IGHV3-11/21 | IGHJ04-01 | 16 | 0 | 0 | 0 | 0 | 0 | Treated | P101-010-0005 |
| CARDSSGWYYFDYW | IGHV3-11/21 | IGHJ04-01 | 0 | 35 | 0 | 0 | 0 | 0 | Naive | P122-206-0023 |
| CARDSSGWYYFDYW | IGHV3-11/21 | IGHJ04-01 | 0 | 0 | 0 | 0 | 0 | 5 | Naive | P122-008-0038 |
