# Supplementary material for: Long-term Sculpting of the B-cell Repertoire following Cancer Immunotherapy in Patients Treated with Sipuleucel-T
Source: Oxford University Press journal article supplement (doi:10.1158/2326-6066.cir-20-0252), 2020-09-23
Supplement: 23266066cir200252-sup-240559_3_supp_6514604_qfq9ft.docx [file 23266066cir200252-sup-240559_3_supp_6514604_qfq9ft.docx]

**Supplementary Fig. 1**

**Supplementary Fig. 1: Study Schema.** The top panel is the study schema for P101 study (treated patients) and the bottom panel is for the STRIDE study schema (naïve patients). As shown in the figure, the treated patients had received sipuleucel-T treatment on average of 8.9 years ago before joined P10-1 study. For both studies, the patients had 3 infusions every 2 weeks (week 0, week 2 and week 4). The baseline was indicated as in the figure, which was right before the 1st infusion. The blood samples were collected at week 0, week 2 and week 4 right before each infusion, as well as at week 6, week 26 and week 52. Both studies have long term follow-up after one year.
