# Supplementary material for: Long-term Sculpting of the B-cell Repertoire following Cancer Immunotherapy in Patients Treated with Sipuleucel-T
Source: Oxford University Press journal article supplement (doi:10.1158/2326-6066.cir-20-0252), 2020-09-23
Supplement: 23266066cir200252-sup-240559_3_supp_6514605_qfd9ft.docx [file 23266066cir200252-sup-240559_3_supp_6514605_qfd9ft.docx]

**Supplementary Fig. 3: Selected convergent groups. (A) Illustration of the groups that are persistently present across all time points for the treated patient. (B) Illustration of the groups induced in the treated patient. (C) Illustration of the induced groups in the naive patient.** Each figure includes the actual nucleotide sequences corresponding to Fig 3E-3G. The colors were coded by ACTG (only first 60 base-pairs were retained due to space limitations). The yellow highlighting shows the hypermutation in the nucleotide sequence, while the bottom row shows the motif analysis. The tables present the clonal abundance for corresponding clones each time point.
